# Supplementary material
Source: publisher figshare collection journal article supplement (https://gsajournals.figshare.com/ndownloader/files/15147788)
Supplement: Supplementary file 1 [file 15147788]

## Sheet: Table S1
Table S1 List of sorghum accessions from the NPGS Ethiopian collection.
PI	SRA	Classification	Name	Origin	Collection Site	Race	WorkGroup
PI147932	SRR7773928	Exotic	Maho	Ethiopia	North of Gibbe crossing	Durra-bicolor (SORGHUM.STC1992)	Subglabrescens (SORGHUM.STC1992)
PI147933	SRR7773927	Exotic	Maho Verro No. 30	Ethiopia	unknown	unknown	unknown
PI147935	SRR7773885	Exotic	Moogra Beecha	Ethiopia	Ankober	Durra (SORGHUM.STC1992)	Durra (SORGHUM.STC1992)
PI195042	SRR7773593	Exotic	MN 3003	Ethiopia	Market, Gondar	Durra (SORGHUM.MAYAGUEZ.1993);Guinea-kafir (SORGHUM.MAYAGUEZ.1993)	Roxburghii-shallu (SORGHUM.MAYAGUEZ.1993);Durra (SORGHUM.MAYAGUEZ.1993)
PI196047	SRR7773592	Exotic	IS 2129	Ethiopia	Dessie	Durra (SORGHUM.STC1995)	Cernuum (SORGHUM.STC1995)
PI196054	SRR7773897	Exotic	MN 3058	Ethiopia	Dessie	Durra (SORGHUM.MAYAGUEZ.1993)	Dochna-durra (SORGHUM.MAYAGUEZ.1993)
PI196890	SRR7773591	Exotic	10085	Ethiopia	Malu farm, 31 miles south of Addis Ababa.	unknown	unknown
PI197462	SRR7773896	Exotic	MN 3125	Ethiopia	Market, Diredawa	unknown	unknown
PI257603	SRR7773705	Exotic	NO. 9 GAMBELA	Ethiopia	unknown	Caudatum (SORGHUM.MAYAGUEZ.1993);Caudatum (SORGHUM.MAYAGUEZ.1993)	Caudatum-kafir (SORGHUM.MAYAGUEZ.1993);Caudatum-kafir (SORGHUM.MAYAGUEZ.1993)
PI260273	SRR7773895	Exotic	not collected	Ethiopia	unknown	unknown	unknown
PI267583	SRR7773596	Exotic	IS 2993	Ethiopia	unknown	unknown	unknown
PI267588	SRR7773595	Exotic	Keyala II	Ethiopia	unknown	unknown	unknown
PI267595	SRR7773911	Exotic	Dogongof	Ethiopia	unknown	Kafir-caudatum (SORGHUM.MAYAGUEZ.1994)	Durra-kafir (SORGHUM.MAYAGUEZ.1994)
PI267623	SRR7773894	Exotic	K2 Sorghum Birdproof	Ethiopia	unknown	Kafir-caudatum (SORGHUM.MAYAGUEZ.1994)	Caffrorum-birdproof (SORGHUM.MAYAGUEZ.1994)
PI267629	SRR7773826	Exotic	IS 3042	Ethiopia	unknown	Durra (SORGHUM.MAYAGUEZ.1994)	Durra (SORGHUM.MAYAGUEZ.1994)
PI267633	SRR7773910	Exotic	IS 3046	Ethiopia	unknown	Durra-bicolor (SORGHUM.MAYAGUEZ.1994)	Durra-bicolor (SORGHUM.MAYAGUEZ.1994)
PI267635	SRR7773893	Exotic	IS 3048	Ethiopia	unknown	Guinea-kafir (SORGHUM.MAYAGUEZ.1994)	Caffrorum-roxburghii (SORGHUM.MAYAGUEZ.1994)
PI273966	SRR7773909	Exotic	MN 4575	Ethiopia	Gondar market	unknown	unknown
PI273969	SRR7773892	Exotic	MN 4578	Ethiopia	Asmara market	unknown	unknown
PI276813	SRR7773765	Exotic	IS 12644	Ethiopia	Dire Dawa Nursery	Durra (SORGHUM.MAYAGUEZ.1994)	Durra-kafir (SORGHUM.MAYAGUEZ.1994)
PI276843	SRR7773708	Exotic	IS 13371	Ethiopia	Dire Dawa Nursery	Durra (SORGHUM.MAYAGUEZ.1994)	Caudatum (SORGHUM.MAYAGUEZ.1994)
PI305022	SRR7773891	Exotic	IS 13741	Ethiopia	unknown	unknown	unknown
PI305044	SRR7773707	Exotic	R2-177	Ethiopia	unknown	unknown	unknown
PI305050	SRR7773908	Exotic	R3-84	Ethiopia	unknown	unknown	unknown
PI305052	SRR7773713	Exotic	R3-86	Ethiopia	unknown	unknown	unknown
PI305055	SRR7773768	Exotic	IS 13771	Ethiopia	unknown	unknown	unknown
PI318909	SRR7773816	Exotic	4539	Ethiopia	Market in Asmara	unknown	unknown
PI329272	SRR7773884	Exotic	IS 11030	Ethiopia	Two hundred eight km east of Nazareth	unknown	unknown
PI329287	SRR7773860	Exotic	IS 11045	Ethiopia	Market in Dire Dawa, Harrar Province	unknown	unknown
PI329288	SRR7773767	Exotic	IS 11046	Ethiopia	Market in Dire Dawa, Harrar Province	unknown	unknown
PI329294	SRR7773883	Exotic	60-B	Ethiopia	Market in Harrar, Harrar Province	unknown	unknown
PI329320	SRR7773943	Exotic	IS 11078	Ethiopia	Ten km west of Ambo near Guder, Shoa Province	unknown	unknown
PI329374	SRR7773942	Exotic	Mashila_D	Ethiopia	South of Kembolcha, Shoa Province	unknown	unknown
PI329386	SRR7773907	Exotic	Mashila_G	Ethiopia	Five km east of Kembolcha, Shoa Province	unknown	unknown
PI329420	SRR7773874	Exotic	Mashila_B	Ethiopia	North of Wechale	unknown	unknown
PI329434	SRR7773701	Exotic	Mashila_A	Ethiopia	Market in Asmara, Eritrea Province	unknown	unknown
PI329436	SRR7773649	Exotic	Mashila_C	Ethiopia	Market in Asmara, Eritrea Province	unknown	unknown
PI329446	SRR7773906	Exotic	IS 11203	Ethiopia	South of Asmara, Eritrea Province	unknown	unknown
PI329479	SRR7773905	Exotic	373-B	Ethiopia	Southwest of Wendo, Sidamo Province	unknown	unknown
PI329480	SRR7773941	Exotic	IS 11236	Ethiopia	West of Shashamane, Shoa Province	unknown	unknown
PI329506	SRR7773940	Exotic	IS 11260	Ethiopia	North of Asella, Arussi Province	unknown	unknown
PI329570	SRR7773904	Exotic	IS 11321	Ethiopia	West of Agaro, Kaffa Province, seven km off road to Bekele, Goga area near border of Illubabor and Kaffa.	unknown	unknown
PI329624	SRR7773926	Exotic	IS 11369	Ethiopia	West of Bako, Shoa Province	unknown	unknown
PI329658	SRR7773939	Exotic	Tekureta	Ethiopia	North of Addis Alem on 100 km at Wayu, Shoa Province	unknown	unknown
PI329733	SRR7773873	Exotic	R-99	Ethiopia	North of Debre Sina, Shoa Province	unknown	unknown
PI329744	SRR7773913	Exotic	Adar_A	Ethiopia	Societe Imprese Africane, Baratoolo Farms, Tessenei, Eritrea Province	unknown	unknown
PI329748	SRR7773642	Exotic	Durra_B	Ethiopia	Societe Imprese Africane, Baratoolo Farms, Tessenei, Eritrea Province	unknown	unknown
PI329752	SRR7773643	Exotic	Durra_C	Ethiopia	Societe Imprese Africane, Baratoolo Farms, Tessenei, Eritrea Province	unknown	unknown
PI329785	SRR7773704	Exotic	Durra_A	Ethiopia	Al Khadra, Hormara Region	unknown	unknown
PI329799	SRR7773703	Exotic	Zerazera	Ethiopia	Al Khadra, Hormara Region	unknown	unknown
PI329863	SRR7773938	Exotic	R-336	Ethiopia	Dejen, north side of the Blue Nile Gorge, Gojjam Province	unknown	unknown
PI329881	SRR7773937	Exotic	Mashila_E	Ethiopia	East of Addis Ababa, Shoa and Harrar Provinces	unknown	unknown
PI329903	SRR7773936	Exotic	Mashila_F	Ethiopia	East of Addis Ababa, Shoa and Harrar Provinces	unknown	unknown
PI329960	SRR7773878	Exotic	R-416	Ethiopia	unknown	unknown	unknown
PI330007	SRR7773770	Exotic	IS 11729	Ethiopia	unknown	unknown	unknown
PI330034	SRR7773720	Exotic	R-499	Ethiopia	unknown	unknown	unknown
PI330077	SRR7773912	Exotic	R-542	Ethiopia	unknown	unknown	unknown
PI330100	SRR7773687	Exotic	IS 11820	Ethiopia	unknown	unknown	unknown
PI330124	SRR7773935	Exotic	IS 11844	Ethiopia	unknown	unknown	unknown
PI330191	SRR7773789	Exotic	IS 11911	Ethiopia	Ten km north of Maichew, Tigre Province	unknown	unknown
PI330259	SRR7773644	Exotic	IS 11976	Ethiopia	West of Asmara, Eritrea Province	unknown	unknown
PI330271	SRR7773790	Exotic	IS 11988	Ethiopia	Robi, Shoa Province.	unknown	unknown
PI330275	SRR7773791	Exotic	P-78	Ethiopia	Between Adi Caieh and Digsa, Eirtrea Province	unknown	unknown
PI330295	SRR7773792	Exotic	Adar_B	Ethiopia	Al Khadra, Homara Region	unknown	unknown
PI330297	SRR7773793	Exotic	Adar_C	Ethiopia	Al Khadra, Homara Region	unknown	unknown
PI330821	SRR7773794	Exotic	Bisinga	Ethiopia	From Nekempt area	unknown	unknown
PI330851	SRR7773934	Exotic	IS 12135	Ethiopia	From Harato, Horro Guduru	unknown	unknown
PI330858	SRR7773933	Exotic	IS 12142	Ethiopia	From Gutte, Nekempt	unknown	unknown
PI330871	SRR7773813	Exotic	IS 12155	Ethiopia	Gambela market	unknown	unknown
PI330911	SRR7773697	Exotic	IS 12195	Ethiopia	Asmara market	unknown	unknown
PI337700	SRR7773872	Exotic	IS 12269	Ethiopia	Tessenei, Societe Imprese Africane	unknown	unknown
PI452556	SRR7773877	Exotic	ETS 2037	Ethiopia	unknown	Durra (SORGHUM.ETHIOPIAN.2000)	Durra (SORGHUM.ETHIOPIAN.2000)
PI452614	SRR7773719	Exotic	ETS 2068	Ethiopia	unknown	unknown	unknown
PI452661	SRR7773795	Exotic	ETS 2093-A	Ethiopia	unknown	Durra-bicolor (SORGHUM.ETHIOPIAN.1998)	Durra-dochna (SORGHUM.ETHIOPIAN.1998)
PI452678	SRR7773600	Exotic	ETS 2102	Ethiopia	unknown	unknown	unknown
PI452680	SRR7773796	Exotic	ETS 2103_B	Ethiopia	unknown	unknown	unknown
PI452681	SRR7773601	Exotic	ETS 2103_A	Ethiopia	unknown	Guinea-caudatum (SORGHUM.ETHIOPIAN.2000)	Nigricans-bicolor (SORGHUM.ETHIOPIAN.2000)
PI452710	SRR7773781	Exotic	ETS 2118	Ethiopia	unknown	Durra (SORGHUM.ETHIOPIAN.2000)	Durra-kafir (SORGHUM.ETHIOPIAN.2000)
PI452719	SRR7773817	Exotic	ETS 2121	Ethiopia	unknown	Durra (SORGHUM.ETHIOPIAN.1998)	Durra (SORGHUM.ETHIOPIAN.1998)
PI452722	SRR7773616	Exotic	ETS 2123	Ethiopia	unknown	Durra (SORGHUM.ETHIOPIAN.1998)	Durra (SORGHUM.ETHIOPIAN.1998)
PI452727	SRR7773782	Exotic	ETS 2126	Ethiopia	unknown	unknown	unknown
PI452728	SRR7773722	Exotic	ETS 2128	Ethiopia	unknown	Durra-caudatum (SORGHUM.ETHIOPIAN.1998)	Nigricans-durra (SORGHUM.ETHIOPIAN.1998)
PI452736	SRR7773721	Exotic	ETS 2132	Ethiopia	unknown	Durra-bicolor (SORGHUM.ETHIOPIAN.1998)	Durra-dochna (SORGHUM.ETHIOPIAN.1998)
PI452762	SRR7773724	Exotic	ETS 2144	Ethiopia	unknown	Durra-bicolor (SORGHUM.ETHIOPIAN.2000)	Subglabrescens (SORGHUM.ETHIOPIAN.2000)
PI452776	SRR7773723	Exotic	ETS 2150	Ethiopia	unknown	Durra (SORGHUM.ETHIOPIAN.1998)	Durra (SORGHUM.ETHIOPIAN.1998)
PI452777	SRR7773726	Exotic	Mutant 2	Ethiopia	unknown	Caudatum-bicolor (SORGHUM.ETHIOPIAN.2000)	Nigricans-bicolor (SORGHUM.ETHIOPIAN.2000)
PI452798	SRR7773725	Exotic	ETS 2158	Ethiopia	unknown	unknown	unknown
PI452803	SRR7773728	Exotic	ETS 2163	Ethiopia	unknown	Durra-bicolor (SORGHUM.ETHIOPIAN.2000)	Subglabrescens (SORGHUM.ETHIOPIAN.2000)
PI452847	SRR7773727	Exotic	ETS 2184	Ethiopia	unknown	Durra-bicolor (SORGHUM.ETHIOPIAN.2000)	Subglabrescens (SORGHUM.ETHIOPIAN.2000)
PI452903	SRR7773730	Exotic	ETS 2209	Ethiopia	unknown	Durra-bicolor (SORGHUM.ETHIOPIAN.1998)	Durra-dochna (SORGHUM.ETHIOPIAN.1998)
PI452908	SRR7773729	Exotic	ETS 2211	Ethiopia	unknown	Durra-bicolor (SORGHUM.ETHIOPIAN.2000)	Durra-bicolor (SORGHUM.ETHIOPIAN.2000)
PI452922	SRR7773624	Exotic	ETS 2217	Ethiopia	unknown	Caudatum-bicolor (SORGHUM.ETHIOPIAN.1998)	Dochna-collier (SORGHUM.ETHIOPIAN.1998)
PI452944	SRR7773865	Exotic	ETS 2231	Ethiopia	unknown	Durra (SORGHUM.ETHIOPIAN.1998)	Mixed (SORGHUM.ETHIOPIAN.1998)
PI452967	SRR7773656	Exotic	ETS 2241	Ethiopia	unknown	Durra-bicolor (SORGHUM.ETHIOPIAN.2000)	Durra-dochna (SORGHUM.ETHIOPIAN.2000)
PI452969	SRR7773625	Exotic	ETS 2242	Ethiopia	unknown	Durra-bicolor (SORGHUM.ETHIOPIAN.2000)	Mixed (SORGHUM.ETHIOPIAN.2000)
PI452987	SRR7773617	Exotic	ETS 2249_A	Ethiopia	unknown	Durra (SORGHUM.ETHIOPIAN.1998)	Durra (SORGHUM.ETHIOPIAN.1998)
PI452988	SRR7773614	Exotic	ETS 2249_B	Ethiopia	unknown	unknown	unknown
PI453010	SRR7773622	Exotic	ETS 2260-A	Ethiopia	unknown	Guinea-durra (SORGHUM.ETHIOPIAN.2000)	Durra-roxburghii (SORGHUM.ETHIOPIAN.2000)
PI453031	SRR7773623	Exotic	ETS 2271	Ethiopia	unknown	Durra-bicolor (SORGHUM.ETHIOPIAN.1998)	Durra-dochna (SORGHUM.ETHIOPIAN.1998)
PI453035	SRR7773615	Exotic	ETS 2273_A	Ethiopia	unknown	Durra (SORGHUM.ETHIOPIAN.1998)	Nandyal (SORGHUM.ETHIOPIAN.1998)
PI453036	SRR7773612	Exotic	ETS 2273_B	Ethiopia	unknown	Durra (SORGHUM.ETHIOPIAN.2000)	Mixed (SORGHUM.ETHIOPIAN.2000)
PI453042	SRR7773613	Exotic	ETS 2276	Ethiopia	unknown	Durra (SORGHUM.ETHIOPIAN.2000)	Cernuum (SORGHUM.ETHIOPIAN.2000)
PI453046	SRR7773628	Exotic	ETS 2277	Ethiopia	unknown	Mixed (SORGHUM.ETHIOPIAN.1998)	Mixed (SORGHUM.ETHIOPIAN.1998)
PI453065	SRR7773610	Exotic	ETS 2286	Ethiopia	unknown	Mixed (SORGHUM.ETHIOPIAN.2000)	Mixed (SORGHUM.ETHIOPIAN.2000)
PI453066	SRR7773611	Exotic	ETS 2288	Ethiopia	unknown	Durra (SORGHUM.ETHIOPIAN.1998)	Mixed (SORGHUM.ETHIOPIAN.1998)
PI453070	SRR7773866	Exotic	ETS 2289	Ethiopia	unknown	Durra (SORGHUM.ETHIOPIAN.1998)	Durra (SORGHUM.ETHIOPIAN.1998)
PI453072	SRR7773590	Exotic	ETS 2290_B	Ethiopia	unknown	Durra (SORGHUM.ETHIOPIAN.1998)	Dochna-durra (SORGHUM.ETHIOPIAN.1998)
PI453073	SRR7773618	Exotic	ETS 2290_A	Ethiopia	unknown	Durra-bicolor (SORGHUM.ETHIOPIAN.1998)	Durra-bicolor (SORGHUM.ETHIOPIAN.1998)
PI453074	SRR7773589	Exotic	ETS 2290_C	Ethiopia	unknown	Durra-bicolor (SORGHUM.ETHIOPIAN.2000)	Durra-bicolor (SORGHUM.ETHIOPIAN.2000)
PI453075	SRR7773588	Exotic	ETS 2291	Ethiopia	unknown	Kafir-durra (SORGHUM.ETHIOPIAN.1998)	Durra-kafir (SORGHUM.ETHIOPIAN.1998)
PI453144	SRR7773587	Exotic	ETS 2327	Ethiopia	unknown	Durra-bicolor (SORGHUM.ETHIOPIAN.1998)	Mixed (SORGHUM.ETHIOPIAN.1998)
PI453159	SRR7773619	Exotic	ETS 2333	Ethiopia	unknown	Durra (SORGHUM.ETHIOPIAN.2000)	Durra (SORGHUM.ETHIOPIAN.2000)
PI453177	SRR7773629	Exotic	ETS 2341	Ethiopia	unknown	Durra-bicolor (SORGHUM.ETHIOPIAN.1998)	Durra-bicolor (SORGHUM.ETHIOPIAN.1998)
PI453186	SRR7773626	Exotic	ETS 2343	Ethiopia	unknown	unknown	unknown
PI453189	SRR7773769	Exotic	ETS 2344	Ethiopia	unknown	Durra-bicolor (SORGHUM.ETHIOPIAN.1998)	Durra-bicolor (SORGHUM.ETHIOPIAN.1998)
PI453195	SRR7773657	Exotic	ETS 2346_A	Ethiopia	unknown	unknown	unknown
PI453196	SRR7773627	Exotic	ETS 2346_B	Ethiopia	unknown	Mixed (SORGHUM.ETHIOPIAN.2000)	Mixed (SORGHUM.ETHIOPIAN.2000)
PI453221	SRR7773716	Exotic	ETS 2356	Ethiopia	unknown	Durra (SORGHUM.ETHIOPIAN.1998)	Durra (SORGHUM.ETHIOPIAN.1998)
PI453251	SRR7773630	Exotic	ETS 2373-A	Ethiopia	unknown	Durra-bicolor (SORGHUM.ETHIOPIAN.2000)	Subglabrescens (SORGHUM.ETHIOPIAN.2000)
PI453275	SRR7773631	Exotic	ETS 2386	Ethiopia	unknown	Durra-bicolor (SORGHUM.ETHIOPIAN.2000)	Mixed (SORGHUM.ETHIOPIAN.2000)
PI453300	SRR7773654	Exotic	ETS 2394	Ethiopia	unknown	Durra-bicolor (SORGHUM.ETHIOPIAN.1998)	Durra-dochna (SORGHUM.ETHIOPIAN.1998)
PI453309	SRR7773840	Exotic	ETS 2399	Ethiopia	unknown	Durra-bicolor (SORGHUM.ETHIOPIAN.1998)	Durra-dochna (SORGHUM.ETHIOPIAN.1998)
PI453320	SRR7773839	Exotic	ETS 2407	Ethiopia	unknown	Mixed (SORGHUM.ETHIOPIAN.1998)	Mixed (SORGHUM.ETHIOPIAN.1998)
PI453380	SRR7773871	Exotic	ETS 2437	Ethiopia	unknown	Durra (SORGHUM.ETHIOPIAN.1998)	Durra (SORGHUM.ETHIOPIAN.1998)
PI453387	SRR7773870	Exotic	ETS 2441	Ethiopia	unknown	Durra (SORGHUM.ETHIOPIAN.1998)	Nandyal (SORGHUM.ETHIOPIAN.1998)
PI453427	SRR7773869	Exotic	ETS 2459	Ethiopia	unknown	unknown	unknown
PI453478	SRR7773868	Exotic	ETS 2488	Ethiopia	unknown	Durra (SORGHUM.ETHIOPIAN.1998)	Cernuum (SORGHUM.ETHIOPIAN.1998)
PI453494	SRR7773838	Exotic	ETS 2496	Ethiopia	unknown	Durra (SORGHUM.ETHIOPIAN.1998)	Mixed (SORGHUM.ETHIOPIAN.1998)
PI453514	SRR7773715	Exotic	ETS 2506	Ethiopia	unknown	Durra (SORGHUM.ETHIOPIAN.1998)	Durra (SORGHUM.ETHIOPIAN.1998)
PI453557	SRR7773762	Exotic	ETS 2530	Ethiopia	unknown	Durra (SORGHUM.ETHIOPIAN.1998)	Nandyal (SORGHUM.ETHIOPIAN.1998)
PI453576	SRR7773867	Exotic	ETS 2546	Ethiopia	unknown	Durra (SORGHUM.ETHIOPIAN.1998)	Durra (SORGHUM.ETHIOPIAN.1998)
PI453587	SRR7773837	Exotic	ETS 2557	Ethiopia	unknown	Durra-bicolor (SORGHUM.ETHIOPIAN.1998)	Durra-bicolor (SORGHUM.ETHIOPIAN.1998)
PI453598	SRR7773876	Exotic	ETS 2563	Ethiopia	unknown	Durra (SORGHUM.ETHIOPIAN.2000)	Cernuum (SORGHUM.ETHIOPIAN.2000)
PI453604	SRR7773844	Exotic	ETS 2566	Ethiopia	unknown	Durra (SORGHUM.ETHIOPIAN.1998)	Durra (SORGHUM.ETHIOPIAN.1998)
PI453635	SRR7773843	Exotic	ETS 2582	Ethiopia	unknown	Kafir-durra (SORGHUM.ETHIOPIAN.1998)	Durra-kafir (SORGHUM.ETHIOPIAN.1998)
PI453641	SRR7773842	Exotic	ETS 2583	Ethiopia	unknown	Durra (SORGHUM.ETHIOPIAN.2000)	Durra-kafir (SORGHUM.ETHIOPIAN.2000)
PI453648	SRR7773841	Exotic	ETS 2587	Ethiopia	unknown	Mixed (SORGHUM.ETHIOPIAN.2000)	Mixed (SORGHUM.ETHIOPIAN.2000)
PI453670	SRR7773846	Exotic	ETS 2598	Ethiopia	unknown	Durra (SORGHUM.ETHIOPIAN.1998)	Durra (SORGHUM.ETHIOPIAN.1998)
PI453680	SRR7773845	Exotic	ETS 2604	Ethiopia	unknown	Durra-bicolor (SORGHUM.ETHIOPIAN.1998)	Durra-bicolor (SORGHUM.ETHIOPIAN.1998)
PI453701	SRR7773718	Exotic	ETS 2613-B	Ethiopia	unknown	Durra (SORGHUM.ETHIOPIAN.1998)	Durra (SORGHUM.ETHIOPIAN.1998)
PI453715	SRR7773745	Exotic	ETS 2622	Ethiopia	unknown	Caudatum (SORGHUM.ETHIOPIAN.1998)	Nigricans (SORGHUM.ETHIOPIAN.1998)
PI453727	SRR7773746	Exotic	ETS 2626	Ethiopia	unknown	Mixed (SORGHUM.ETHIOPIAN.2000)	Mixed (SORGHUM.ETHIOPIAN.2000)
PI453744	SRR7773747	Exotic	ETS 2635	Ethiopia	unknown	Mixed (SORGHUM.ETHIOPIAN.2000)	Mixed (SORGHUM.ETHIOPIAN.2000)
PI453749	SRR7773748	Exotic	ETS 2638	Ethiopia	unknown	Caudatum-bicolor (SORGHUM.ETHIOPIAN.2000)	Mixed (SORGHUM.ETHIOPIAN.2000)
PI453780	SRR7773741	Exotic	ETS 2653	Ethiopia	unknown	Durra-bicolor (SORGHUM.ETHIOPIAN.1998)	Durra-dochna (SORGHUM.ETHIOPIAN.1998)
PI453781	SRR7773742	Exotic	ETS 2654	Ethiopia	unknown	Mixed (SORGHUM.ETHIOPIAN.1998)	Mixed (SORGHUM.ETHIOPIAN.1998)
PI453811	SRR7773655	Exotic	ETS 2669	Ethiopia	unknown	Durra-bicolor (SORGHUM.ETHIOPIAN.2000)	Durra-dochna (SORGHUM.ETHIOPIAN.2000)
PI453821	SRR7773684	Exotic	ETS 2673	Ethiopia	unknown	Durra (SORGHUM.STC1997)	Nandyal (SORGHUM.STC1997)
PI453831	SRR7773685	Exotic	ETS 2678	Ethiopia	unknown	Durra (SORGHUM.ETHIOPIAN.1998)	Cernuum (SORGHUM.ETHIOPIAN.1998)
PI453834	SRR7773660	Exotic	ETS 2679	Ethiopia	unknown	Durra-bicolor (SORGHUM.ETHIOPIAN.1998)	Durra-dochna (SORGHUM.ETHIOPIAN.1998)
PI453845	SRR7773743	Exotic	ETS 2690	Ethiopia	unknown	Mixed (SORGHUM.ETHIOPIAN.1998)	Mixed (SORGHUM.ETHIOPIAN.1998)
PI453847	SRR7773744	Exotic	ETS 2692	Ethiopia	unknown	Mixed (SORGHUM.ETHIOPIAN.2000)	Mixed (SORGHUM.ETHIOPIAN.2000)
PI453882	SRR7773932	Exotic	ETS 2710	Ethiopia	unknown	Durra-bicolor (SORGHUM.ETHIOPIAN.1998)	Durra-dochna (SORGHUM.ETHIOPIAN.1998)
PI453884	SRR7773749	Exotic	ETS 2711	Ethiopia	unknown	Mixed (SORGHUM.ETHIOPIAN.1998)	Mixed (SORGHUM.ETHIOPIAN.1998)
PI453890	SRR7773750	Exotic	ETS 2715	Ethiopia	unknown	Durra-bicolor (SORGHUM.ETHIOPIAN.1998)	S. almum (SORGHUM.ETHIOPIAN.1998)
PI453919	SRR7773679	Exotic	ETS 2730	Ethiopia	unknown	Caudatum (SORGHUM.ETHIOPIAN.1998)	Nigricans (SORGHUM.ETHIOPIAN.1998)
PI453928	SRR7773818	Exotic	ETS 2735	Ethiopia	unknown	Durra (SORGHUM.ETHIOPIAN.1998)	Cernuum (SORGHUM.ETHIOPIAN.1998)
PI453936	SRR7773594	Exotic	ETS 2739	Ethiopia	unknown	Durra-bicolor (SORGHUM.ETHIOPIAN.2000)	Durra-dochna (SORGHUM.ETHIOPIAN.2000)
PI453938	SRR7773678	Exotic	ETS 2741	Ethiopia	unknown	unknown	unknown
PI453947	SRR7773819	Exotic	ETS 2745	Ethiopia	unknown	Durra (SORGHUM.ETHIOPIAN.2000)	Cernuum (SORGHUM.ETHIOPIAN.2000)
PI453953	SRR7773661	Exotic	ETS 2748	Ethiopia	unknown	Durra-bicolor (SORGHUM.ETHIOPIAN.2000)	Subglabrescens (SORGHUM.ETHIOPIAN.2000)
PI453967	SRR7773681	Exotic	ETS 2755	Ethiopia	unknown	Durra-bicolor (SORGHUM.ETHIOPIAN.1998)	Durra-dochna (SORGHUM.ETHIOPIAN.1998)
PI454021	SRR7773931	Exotic	ETS 2784	Ethiopia	unknown	Durra-bicolor (SORGHUM.ETHIOPIAN.1998)	Durra-dochna (SORGHUM.ETHIOPIAN.1998)
PI454058	SRR7773680	Exotic	ETS 2805	Ethiopia	unknown	Durra-bicolor (SORGHUM.ETHIOPIAN.2000)	Durra-dochna (SORGHUM.ETHIOPIAN.2000)
PI454067	SRR7773675	Exotic	ETS 2809	Ethiopia	unknown	Durra-caudatum (SORGHUM.ETHIOPIAN.1998)	Nigricans-durra (SORGHUM.ETHIOPIAN.1998)
PI454083	SRR7773820	Exotic	ETS 2816	Ethiopia	unknown	Durra-bicolor (SORGHUM.ETHIOPIAN.1998)	Durra-dochna (SORGHUM.ETHIOPIAN.1998)
PI454086	SRR7773761	Exotic	ETS 2817	Ethiopia	unknown	Kafir-durra (SORGHUM.ETHIOPIAN.2000)	Durra-kafir (SORGHUM.ETHIOPIAN.2000)
PI454148	SRR7773674	Exotic	ETS 2845	Ethiopia	unknown	Kafir-durra (SORGHUM.ETHIOPIAN.2000)	Durra-kafir (SORGHUM.ETHIOPIAN.2000)
PI454153	SRR7773677	Exotic	ETS 2848_A	Ethiopia	unknown	unknown	unknown
PI454154	SRR7773676	Exotic	ETS 2848_B	Ethiopia	unknown	Guinea-durra (SORGHUM.ETHIOPIAN.2000)	Durra-roxburghii (SORGHUM.ETHIOPIAN.2000)
PI454214	SRR7773875	Exotic	ETS 2889	Ethiopia	unknown	Durra (SORGHUM.ETHIOPIAN.1998)	Nandyal (SORGHUM.ETHIOPIAN.1998)
PI454221	SRR7773671	Exotic	ETS 2894	Ethiopia	unknown	Mixed (SORGHUM.ETHIOPIAN.2000)	Mixed (SORGHUM.ETHIOPIAN.2000)
PI454226	SRR7773890	Exotic	ETS 2896	Ethiopia	unknown	Guinea-durra (SORGHUM.ETHIOPIAN.2000)	Durra-roxburghii (SORGHUM.ETHIOPIAN.2000)
PI454234	SRR7773670	Exotic	ETS 2902	Ethiopia	unknown	Durra (SORGHUM.ETHIOPIAN.1998)	Nandyal (SORGHUM.ETHIOPIAN.1998)
PI454246	SRR7773583	Exotic	ETS 2915	Ethiopia	unknown	Durra (SORGHUM.ETHIOPIAN.1998)	Nandyal (SORGHUM.ETHIOPIAN.1998)
PI454293	SRR7773849	Exotic	ETS 2941	Ethiopia	unknown	Durra (SORGHUM.ETHIOPIAN.2000)	Cernuum (SORGHUM.ETHIOPIAN.2000)
PI454296	SRR7773584	Exotic	ETS 2944	Ethiopia	unknown	Durra-bicolor (SORGHUM.ETHIOPIAN.2000)	Subglabrescens (SORGHUM.ETHIOPIAN.2000)
PI454323	SRR7773581	Exotic	ETS 2960	Ethiopia	unknown	Mixed (SORGHUM.ETHIOPIAN.2000)	Mixed (SORGHUM.ETHIOPIAN.2000)
PI454382	SRR7773850	Exotic	ETS 2991	Ethiopia	unknown	Durra (SORGHUM.ETHIOPIAN.1998)	Cernuum (SORGHUM.ETHIOPIAN.1998)
PI454443	SRR7773582	Exotic	ETS 3026	Ethiopia	unknown	Durra-bicolor (SORGHUM.ETHIOPIAN.1998)	Durra-dochna (SORGHUM.ETHIOPIAN.1998)
PI454483	SRR7773861	Exotic	ETS 3063	Ethiopia	unknown	Kafir-durra (SORGHUM.ETHIOPIAN.1998)	Durra-kafir (SORGHUM.ETHIOPIAN.1998)
PI454484	SRR7773602	Exotic	ETS 3066	Ethiopia	unknown	Durra (SORGHUM.ETHIOPIAN.1998)	Durra (SORGHUM.ETHIOPIAN.1998)
PI454516	SRR7773579	Exotic	ETS 3089-B	Ethiopia	unknown	Bicolor (SORGHUM.ETHIOPIAN.1998)	Nervosum-broomcorn (SORGHUM.ETHIOPIAN.1998)
PI454519	SRR7773580	Exotic	ETS 3091	Ethiopia	unknown	Durra (SORGHUM.ETHIOPIAN.1998)	Durra (SORGHUM.ETHIOPIAN.1998)
PI454534	SRR7773847	Exotic	ETS 3104	Ethiopia	unknown	Kafir-durra (SORGHUM.ETHIOPIAN.1998)	Durra-kafir (SORGHUM.ETHIOPIAN.1998)
PI454556	SRR7773658	Exotic	ETS 3117	Ethiopia	unknown	Durra-bicolor (SORGHUM.ETHIOPIAN.2000)	Durra-dochna (SORGHUM.ETHIOPIAN.2000)
PI454571	SRR7773603	Exotic	ETS 3126-A	Ethiopia	unknown	Caudatum (SORGHUM.ETHIOPIAN.2000)	Caudatum-kafir (SORGHUM.ETHIOPIAN.2000)
PI454572	SRR7773947	Exotic	ETS 3126-B	Ethiopia	unknown	Guinea-caudatum (SORGHUM.ETHIOPIAN.1998)	Caudatum-guineense (SORGHUM.ETHIOPIAN.1998)
PI454584	SRR7773862	Exotic	ETS 3131	Ethiopia	unknown	Kafir-durra (SORGHUM.ETHIOPIAN.1998)	Durra-kafir (SORGHUM.ETHIOPIAN.1998)
PI454594	SRR7773848	Exotic	ETS 3136	Ethiopia	unknown	Durra (SORGHUM.ETHIOPIAN.1998)	Nandyal (SORGHUM.ETHIOPIAN.1998)
PI454609	SRR7773578	Exotic	ETS 3143	Ethiopia	unknown	Durra (SORGHUM.ETHIOPIAN.2000)	Cernuum (SORGHUM.ETHIOPIAN.2000)
PI454629	SRR7773853	Exotic	ETS 3153	Ethiopia	unknown	Durra (SORGHUM.ETHIOPIAN.1998)	Durra (SORGHUM.ETHIOPIAN.1998)
PI454632	SRR7773854	Exotic	ETS 3154	Ethiopia	unknown	Durra (SORGHUM.ETHIOPIAN.1998)	Cernuum (SORGHUM.ETHIOPIAN.1998)
PI454642	SRR7773851	Exotic	ETS 3160	Ethiopia	unknown	Kafir-durra (SORGHUM.ETHIOPIAN.1998)	Durra-kafir (SORGHUM.ETHIOPIAN.1998)
PI454716	SRR7773945	Exotic	ETS 3198	Ethiopia	unknown	Durra (SORGHUM.ETHIOPIAN.1998)	Durra (SORGHUM.ETHIOPIAN.1998)
PI454791	SRR7773863	Exotic	ETS 3232	Ethiopia	unknown	Durra (SORGHUM.ETHIOPIAN.1998)	Nandyal (SORGHUM.ETHIOPIAN.1998)
PI454873	SRR7773946	Exotic	ETS 3278	Ethiopia	unknown	Durra-bicolor (SORGHUM.ETHIOPIAN.1998)	Durra-dochna (SORGHUM.ETHIOPIAN.1998)
PI454881	SRR7773812	Exotic	ETS 3281	Ethiopia	unknown	Durra-bicolor (SORGHUM.ETHIOPIAN.2000)	Durra-bicolor (SORGHUM.ETHIOPIAN.2000)
PI454890	SRR7773864	Exotic	ETS 3285	Ethiopia	unknown	Mixed (SORGHUM.ETHIOPIAN.2000)	Mixed (SORGHUM.ETHIOPIAN.2000)
PI454936	SRR7773811	Exotic	ETS 3312	Ethiopia	unknown	unknown	unknown
PI454941	SRR7773665	Exotic	ETS 3314	Ethiopia	unknown	Kafir-bicolor (SORGHUM.ETHIOPIAN.2000)	Caffrorum-bicolor (SORGHUM.ETHIOPIAN.2000)
PI454981	SRR7773664	Exotic	ETS 3333	Ethiopia	unknown	Guinea-bicolor (SORGHUM.ETHIOPIAN.2000)	Dochna-roxburghii (SORGHUM.ETHIOPIAN.2000)
PI454987	SRR7773808	Exotic	ETS 3336	Ethiopia	unknown	Kafir-bicolor (SORGHUM.ETHIOPIAN.1998)	Caffrorum-bicolor (SORGHUM.ETHIOPIAN.1998)
PI454991	SRR7773682	Exotic	ETS 3339	Ethiopia	unknown	Guinea-caudatum (SORGHUM.ETHIOPIAN.1998)	Nigricans-guineense (SORGHUM.ETHIOPIAN.1998)
PI454998	SRR7773807	Exotic	ETS 3343	Ethiopia	unknown	Guinea-durra (SORGHUM.ETHIOPIAN.2000)	Durra-roxburghii (SORGHUM.ETHIOPIAN.2000)
PI455017	SRR7773806	Exotic	ETS 3351	Ethiopia	unknown	Durra-bicolor (SORGHUM.ETHIOPIAN.1998)	Durra-dochna (SORGHUM.ETHIOPIAN.1998)
PI455036	SRR7773805	Exotic	ETS 3361	Ethiopia	unknown	Durra-bicolor (SORGHUM.ETHIOPIAN.1998)	Durra-dochna (SORGHUM.ETHIOPIAN.1998)
PI455038	SRR7773804	Exotic	ETS 3362	Ethiopia	unknown	Kafir (SORGHUM.ETHIOPIAN.89);Guinea-durra (SORGHUM.ETHIOPIAN.2000)	Durra-roxburghii (SORGHUM.ETHIOPIAN.2000)
PI455070	SRR7773683	Exotic	ETS 3377	Ethiopia	unknown	Durra-caudatum (SORGHUM.ETHIOPIAN.1998)	Caudatum-durra (SORGHUM.ETHIOPIAN.1998)
PI455099	SRR7773645	Exotic	ETS 3394	Ethiopia	unknown	Durra (SORGHUM.ETHIOPIAN.2000)	Durra (SORGHUM.ETHIOPIAN.2000)
PI455100	SRR7773857	Exotic	ETS 3396	Ethiopia	unknown	Durra-bicolor (SORGHUM.ETHIOPIAN.1998)	Durra-bicolor (SORGHUM.ETHIOPIAN.1998)
PI455140	SRR7773803	Exotic	ETS 3413	Ethiopia	unknown	Mixed (SORGHUM.ETHIOPIAN.2000)	Mixed (SORGHUM.ETHIOPIAN.2000)
PI455144	SRR7773604	Exotic	ETS 3414	Ethiopia	unknown	Guinea-durra (SORGHUM.ETHIOPIAN.1998)	Durra-roxburghii (SORGHUM.ETHIOPIAN.1998)
PI455154	SRR7773690	Exotic	ETS 3419	Ethiopia	unknown	Durra (SORGHUM.ETHIOPIAN.89);Kafir-durra (SORGHUM.ETHIOPIAN.2000)	Durra-kafir (SORGHUM.ETHIOPIAN.2000)
PI455180	SRR7773717	Exotic	ETS 3435_A	Ethiopia	unknown	Durra (SORGHUM.ETHIOPIAN.89);Durra (SORGHUM.ETHIOPIAN.2000)	Durra (SORGHUM.ETHIOPIAN.2000)
PI455182	SRR7773693	Exotic	ETS 3435_B	Ethiopia	unknown	Durra-bicolor (SORGHUM.ETHIOPIAN.1998)	Durra-dochna (SORGHUM.ETHIOPIAN.1998)
PI455213	SRR7773694	Exotic	ETS 3452	Ethiopia	unknown	Durra-bicolor (SORGHUM.ETHIOPIAN.1998)	Durra-dochna (SORGHUM.ETHIOPIAN.1998)
PI455248	SRR7773659	Exotic	ETS 3471	Ethiopia	unknown	Durra-bicolor (SORGHUM.ETHIOPIAN.1998)	Durra-dochna (SORGHUM.ETHIOPIAN.1998)
PI455288	SRR7773599	Exotic	ETS 3489	Ethiopia	unknown	Durra-bicolor (SORGHUM.ETHIOPIAN.1998)	Durra-dochna (SORGHUM.ETHIOPIAN.1998)
PI455295	SRR7773696	Exotic	ETS 3492-A	Ethiopia	unknown	Durra-bicolor (SORGHUM.ETHIOPIAN.1998)	Durra-bicolor (SORGHUM.ETHIOPIAN.1998)
PI455312	SRR7773621	Exotic	ETS 3499	Ethiopia	unknown	Kafir (SORGHUM.ETHIOPIAN.89);Durra (SORGHUM.ETHIOPIAN.1998)	Durra (SORGHUM.ETHIOPIAN.1998)
PI455330	SRR7773712	Exotic	ETS 3508	Ethiopia	unknown	Durra (SORGHUM.ETHIOPIAN.89);Durra (SORGHUM.ETHIOPIAN.1998)	Durra (SORGHUM.ETHIOPIAN.1998)
PI455351	SRR7773698	Exotic	ETS 3522	Ethiopia	unknown	Durra-bicolor (SORGHUM.ETHIOPIAN.1998)	Durra-dochna (SORGHUM.ETHIOPIAN.1998)
PI455365	SRR7773699	Exotic	ETS 3530	Ethiopia	unknown	Durra-bicolor (SORGHUM.ETHIOPIAN.2000)	Durra-dochna (SORGHUM.ETHIOPIAN.2000)
PI455384	SRR7773711	Exotic	ETS 3544	Ethiopia	unknown	Durra (SORGHUM.ETHIOPIAN.1998)	Durra (SORGHUM.ETHIOPIAN.1998)
PI455391	SRR7773700	Exotic	ETS 3550-B	Ethiopia	unknown	unknown	unknown
PI455413	SRR7773714	Exotic	ETS 3556	Ethiopia	unknown	Durra (SORGHUM.ETHIOPIAN.1998)	Durra (SORGHUM.ETHIOPIAN.1998)
PI455443	SRR7773821	Exotic	ETS 3573	Ethiopia	unknown	Durra (SORGHUM.ETHIOPIAN.1998)	Durra (SORGHUM.ETHIOPIAN.1998)
PI455451	SRR7773852	Exotic	ETS 3578	Ethiopia	unknown	Durra (SORGHUM.ETHIOPIAN.1998)	Cernuum (SORGHUM.ETHIOPIAN.1998)
PI455484	SRR7773815	Exotic	ETS 3597	Ethiopia	unknown	Guinea-durra (SORGHUM.ETHIOPIAN.2000)	Durra-roxburghii (SORGHUM.ETHIOPIAN.2000)
PI455530	SRR7773702	Exotic	ETS 3625	Ethiopia	unknown	Caudatum-bicolor (SORGHUM.ETHIOPIAN.1998)	Nigricans-bicolor (SORGHUM.ETHIOPIAN.1998)
PI455532	SRR7773640	Exotic	ETS 3626	Ethiopia	unknown	Mixed (SORGHUM.ETHIOPIAN.2000)	Mixed (SORGHUM.ETHIOPIAN.2000)
PI455538	SRR7773641	Exotic	ETS 3632	Ethiopia	unknown	Guinea-durra (SORGHUM.ETHIOPIAN.1998)	Durra-roxburghii (SORGHUM.ETHIOPIAN.1998)
PI455545	SRR7773638	Exotic	ETS 3636	Ethiopia	unknown	Bicolor (SORGHUM.ETHIOPIAN.2000)	Nervosum (SORGHUM.ETHIOPIAN.2000)
PI455549	SRR7773639	Exotic	ETS 3638	Ethiopia	unknown	Guinea (SORGHUM.ETHIOPIAN.2000)	Roxburghii (SORGHUM.ETHIOPIAN.2000)
PI455558	SRR7773636	Exotic	ETS 3646	Ethiopia	unknown	Mixed (SORGHUM.ETHIOPIAN.2000)	Mixed (SORGHUM.ETHIOPIAN.2000)
PI455585	SRR7773637	Exotic	ETS 3674	Ethiopia	unknown	Durra (SORGHUM.ETHIOPIAN.1998)	Durra (SORGHUM.ETHIOPIAN.1998)
PI455606	SRR7773634	Exotic	ETS 3692	Ethiopia	unknown	Durra (SORGHUM.ETHIOPIAN.89);Durra (SORGHUM.ETHIOPIAN.1998)	Nandyal (SORGHUM.ETHIOPIAN.1998)
PI455616	SRR7773691	Exotic	ETS 3702	Ethiopia	unknown	Durra (SORGHUM.ETHIOPIAN.1998)	Cernuum (SORGHUM.ETHIOPIAN.1998)
PI455674	SRR7773855	Exotic	ETS 3735	Ethiopia	unknown	Mixed (SORGHUM.ETHIOPIAN.2000)	Mixed (SORGHUM.ETHIOPIAN.2000)
PI455693	SRR7773856	Exotic	ETS 3745	Ethiopia	unknown	Durra (SORGHUM.ETHIOPIAN.2000)	Durra-kafir (SORGHUM.ETHIOPIAN.2000)
PI455698	SRR7773635	Exotic	ETS 3748	Ethiopia	unknown	Mixed (SORGHUM.ETHIOPIAN.2000)	Mixed (SORGHUM.ETHIOPIAN.2000)
PI455746	SRR7773632	Exotic	ETS 3777	Ethiopia	unknown	Durra (SORGHUM.ETHIOPIAN.2000)	Subglabrescens-milo (SORGHUM.ETHIOPIAN.2000)
PI455751	SRR7773633	Exotic	ETS 3778	Ethiopia	unknown	Durra-bicolor (SORGHUM.ETHIOPIAN.1998)	Durra-dochna (SORGHUM.ETHIOPIAN.1998)
PI455787	SRR7773738	Exotic	ETS 3791	Ethiopia	unknown	Durra-bicolor (SORGHUM.ETHIOPIAN.1998)	Durra-dochna (SORGHUM.ETHIOPIAN.1998)
PI455791	SRR7773737	Exotic	ETS 3793	Ethiopia	unknown	Durra (SORGHUM.ETHIOPIAN.1998)	Durra (SORGHUM.ETHIOPIAN.1998)
PI455806	SRR7773740	Exotic	ETS 3801	Ethiopia	unknown	Durra-bicolor (SORGHUM.ETHIOPIAN.1998)	Durra-bicolor (SORGHUM.ETHIOPIAN.1998)
PI455811	SRR7773739	Exotic	ETS 3803	Ethiopia	unknown	Durra (SORGHUM.ETHIOPIAN.1998)	Mixed (SORGHUM.ETHIOPIAN.1998)
PI455830	SRR7773734	Exotic	ETS 3814	Ethiopia	unknown	Kafir-durra (SORGHUM.ETHIOPIAN.1998)	Durra-kafir (SORGHUM.ETHIOPIAN.1998)
PI455881	SRR7773733	Exotic	ETS 3835-B	Ethiopia	unknown	Durra-bicolor (SORGHUM.ETHIOPIAN.1998)	Durra-dochna (SORGHUM.ETHIOPIAN.1998)
PI455892	SRR7773736	Exotic	ETS 3842	Ethiopia	unknown	Durra-caudatum (SORGHUM.ETHIOPIAN.1998)	Nigricans-durra (SORGHUM.ETHIOPIAN.1998)
PI455901	SRR7773735	Exotic	ETS 3845	Ethiopia	unknown	Durra-bicolor (SORGHUM.ETHIOPIAN.1998)	Durra-dochna (SORGHUM.ETHIOPIAN.1998)
PI455930	SRR7773732	Exotic	ETS 3857	Ethiopia	unknown	Kafir-durra (SORGHUM.ETHIOPIAN.1998)	Durra-kafir (SORGHUM.ETHIOPIAN.1998)
PI455947	SRR7773731	Exotic	ETS 3865	Ethiopia	unknown	Guinea-durra (SORGHUM.ETHIOPIAN.2000)	Durra-roxburghii (SORGHUM.ETHIOPIAN.2000)
PI455954	SRR7773801	Exotic	ETS 3867	Ethiopia	unknown	Durra-bicolor (SORGHUM.ETHIOPIAN.1998)	Durra-dochna (SORGHUM.ETHIOPIAN.1998)
PI455976	SRR7773802	Exotic	ETS 3878	Ethiopia	unknown	Durra (SORGHUM.ETHIOPIAN.1998)	Nandyal (SORGHUM.ETHIOPIAN.1998)
PI455987	SRR7773662	Exotic	ETS 3883	Ethiopia	unknown	Durra-bicolor (SORGHUM.ETHIOPIAN.1998)	Durra-dochna (SORGHUM.ETHIOPIAN.1998)
PI456024	SRR7773663	Exotic	ETS 3900	Ethiopia	unknown	Durra (SORGHUM.ETHIOPIAN.2000)	Durra-kafir (SORGHUM.ETHIOPIAN.2000)
PI456037	SRR7773797	Exotic	ETS 3906	Ethiopia	unknown	Kafir-durra (SORGHUM.ETHIOPIAN.1998)	Durra-kafir (SORGHUM.ETHIOPIAN.1998)
PI456042	SRR7773757	Exotic	ETS 3910	Ethiopia	unknown	Durra (SORGHUM.ETHIOPIAN.1998)	Durra (SORGHUM.ETHIOPIAN.1998)
PI456056	SRR7773798	Exotic	ETS 3916	Ethiopia	unknown	Durra-bicolor (SORGHUM.ETHIOPIAN.2000)	Durra-bicolor (SORGHUM.ETHIOPIAN.2000)
PI456094	SRR7773799	Exotic	ETS 3935	Ethiopia	unknown	Mixed (SORGHUM.ETHIOPIAN.2000)	Mixed (SORGHUM.ETHIOPIAN.2000)
PI456103	SRR7773650	Exotic	ETS 3939	Ethiopia	unknown	Durra (SORGHUM.ETHIOPIAN.2000)	Subglabrescens-milo (SORGHUM.ETHIOPIAN.2000)
PI456110	SRR7773686	Exotic	ETS 3942	Ethiopia	unknown	unknown	unknown
PI456113	SRR7773800	Exotic	ETS 3944	Ethiopia	unknown	Durra-bicolor (SORGHUM.ETHIOPIAN.1998)	Durra-dochna (SORGHUM.ETHIOPIAN.1998)
PI456128	SRR7773925	Exotic	ETS 3952	Ethiopia	unknown	Kafir-durra (SORGHUM.ETHIOPIAN.1998)	Durra-kafir (SORGHUM.ETHIOPIAN.1998)
PI456142	SRR7773648	Exotic	ETS 3961	Ethiopia	unknown	Durra (SORGHUM.ETHIOPIAN.1998)	Mixed (SORGHUM.ETHIOPIAN.1998)
PI456157	SRR7773809	Exotic	ETS 3968	Ethiopia	unknown	Guinea-durra (SORGHUM.ETHIOPIAN.1998)	Durra-roxburghii (SORGHUM.ETHIOPIAN.1998)
PI456158	SRR7773651	Exotic	ETS 3969	Ethiopia	unknown	Durra (SORGHUM.ETHIOPIAN.2000)	Mixed (SORGHUM.ETHIOPIAN.2000)
PI456254	SRR7773810	Exotic	ETS 4024	Ethiopia	unknown	Bicolor (SORGHUM.ETHIOPIAN.1998)	Dochna (SORGHUM.ETHIOPIAN.1998)
PI456256	SRR7773924	Exotic	ETS 4026	Ethiopia	unknown	Durra (SORGHUM.ETHIOPIAN.2000)	Mixed (SORGHUM.ETHIOPIAN.2000)
PI456272	SRR7773917	Exotic	ETS 4033	Ethiopia	unknown	Durra (SORGHUM.ETHIOPIAN.1998)	Cernuum (SORGHUM.ETHIOPIAN.1998)
PI456293	SRR7773916	Exotic	ETS 4044	Ethiopia	unknown	Durra-bicolor (SORGHUM.ETHIOPIAN.1998)	Durra-dochna (SORGHUM.ETHIOPIAN.1998)
PI456300	SRR7773901	Exotic	ETS 4047	Ethiopia	unknown	Mixed (SORGHUM.ETHIOPIAN.2000)	Mixed (SORGHUM.ETHIOPIAN.2000)
PI456304	SRR7773915	Exotic	ETS 4049	Ethiopia	unknown	unknown	unknown
PI456314	SRR7773930	Exotic	ETS 4054	Ethiopia	unknown	Durra (SORGHUM.ETHIOPIAN.2000)	Cernuum (SORGHUM.ETHIOPIAN.2000)
PI456342	SRR7773914	Exotic	ETS 4070	Ethiopia	unknown	Durra-bicolor (SORGHUM.ETHIOPIAN.1998)	Durra-bicolor (SORGHUM.ETHIOPIAN.1998)
PI456354	SRR7773921	Exotic	ETS 4076	Ethiopia	unknown	Guinea-durra (SORGHUM.ETHIOPIAN.1998)	Durra-membranaceum (SORGHUM.ETHIOPIAN.1998)
PI456357	SRR7773920	Exotic	ETS 4078	Ethiopia	unknown	Durra (SORGHUM.ETHIOPIAN.1998)	Cernuum (SORGHUM.ETHIOPIAN.1998)
PI456359	SRR7773919	Exotic	ETS 4079	Ethiopia	unknown	Durra-caudatum (SORGHUM.ETHIOPIAN.1998)	Nigricans-durra (SORGHUM.ETHIOPIAN.1998)
PI456394	SRR7773880	Exotic	ETS 4103	Ethiopia	unknown	Durra-caudatum (SORGHUM.ETHIOPIAN.1998)	Caudatum-durra (SORGHUM.ETHIOPIAN.1998)
PI456398	SRR7773759	Exotic	ETS 4104	Ethiopia	unknown	Durra (SORGHUM.ETHIOPIAN.1998)	Mixed (SORGHUM.ETHIOPIAN.1998)
PI456414	SRR7773828	Exotic	ETS 4114	Ethioia	unknown	Durra (SORGHUM.ETHIOPIAN.1998)	Durra (SORGHUM.ETHIOPIAN.1998)
PI456415	SRR7773752	Exotic	ETS 4115	Ethiopia	unknown	Durra (SORGHUM.ETHIOPIAN.1998)	Durra (SORGHUM.ETHIOPIAN.1998)
PI456478	SRR7773918	Exotic	ETS 4153	Ethiopia	unknown	Durra (SORGHUM.ETHIOPIAN.2000)	Durra-kafir (SORGHUM.ETHIOPIAN.2000)
PI456488	SRR7773751	Exotic	ETS 4157	Ethiopia	unknown	Durra (SORGHUM.ETHIOPIAN.2000)	Durra (SORGHUM.ETHIOPIAN.2000)
PI456490	SRR7773754	Exotic	ETS 4159	Ethiopia	unknown	unknown	unknown
PI456499	SRR7773753	Exotic	ETS 4165	Ethiopia	unknown	unknown	unknown
PI456522	SRR7773756	Exotic	ETS 4182	Ethiopia	unknown	Durra-bicolor (SORGHUM.ETHIOPIAN.2000)	Durra-bicolor (SORGHUM.ETHIOPIAN.2000)
PI456538	SRR7773758	Exotic	ETS 4191	Ethiopia	unknown	Durra (SORGHUM.ETHIOPIAN.2000)	Durra (SORGHUM.ETHIOPIAN.2000)
PI456581	SRR7773923	Exotic	ETS 4226	Ethiopia	unknown	Durra (SORGHUM.ETHIOPIAN.2000)	Durra (SORGHUM.ETHIOPIAN.2000)
PI456605	SRR7773646	Exotic	ETS 4238	Ethiopia	unknown	Durra (SORGHUM.ETHIOPIAN.2000)	Durra-kafir (SORGHUM.ETHIOPIAN.2000)
PI456610	SRR7773922	Exotic	ETS 4240	Ethiopia	unknown	Durra-bicolor (SORGHUM.ETHIOPIAN.2000)	Subglabrescens (SORGHUM.ETHIOPIAN.2000)
PI456623	SRR7773668	Exotic	ETS 4248	Ethiopia	unknown	Durra (SORGHUM.ETHIOPIAN.2000)	Durra-kafir (SORGHUM.ETHIOPIAN.2000)
PI456632	SRR7773669	Exotic	ETS 4255	Ethiopia	unknown	Durra (SORGHUM.ETHIOPIAN.2000)	Subglabrescens-milo (SORGHUM.ETHIOPIAN.2000)
PI456660	SRR7773824	Exotic	ETS 4271	Ethiopia	unknown	Mixed (SORGHUM.ETHIOPIAN.2000)	Mixed (SORGHUM.ETHIOPIAN.2000)
PI456685	SRR7773886	Exotic	ETS 4284	Ethiopia	unknown	Durra-caudatum (SORGHUM.ETHIOPIAN.2000)	Nigricans-durra (SORGHUM.ETHIOPIAN.2000)
PI456687	SRR7773666	Exotic	ETS 4285-A	Ethiopia	unknown	Durra (SORGHUM.ETHIOPIAN.2000)	Durra-kafir (SORGHUM.ETHIOPIAN.2000)
PI456696	SRR7773667	Exotic	ETS 4289	Ethiopia	unknown	Durra (SORGHUM.ETHIOPIAN.2000)	Subglabrescens-milo (SORGHUM.ETHIOPIAN.2000)
PI456711	SRR7773898	Exotic	ETS 4295	Ethiopia	unknown	Durra (SORGHUM.ETHIOPIAN.2000)	Dochna-durra (SORGHUM.ETHIOPIAN.2000)
PI456739	SRR7773903	Exotic	ETS 4308	Ethiopia	unknown	Durra (SORGHUM.ETHIOPIAN.2000)	Durra-kafir (SORGHUM.ETHIOPIAN.2000)
PI456767	SRR7773672	Exotic	ETS 4324	Ethiopia	unknown	Durra (SORGHUM.ETHIOPIAN.2000)	Subglabrescens-milo (SORGHUM.ETHIOPIAN.2000)
PI456793	SRR7773673	Exotic	ETS 4336	Ethiopia	unknown	Guinea-durra (SORGHUM.ETHIOPIAN.2000)	Durra-roxburghii (SORGHUM.ETHIOPIAN.2000)
PI456795	SRR7773902	Exotic	ETS 4337	Ethiopia	unknown	Guinea-durra (SORGHUM.ETHIOPIAN.2000)	Durra-roxburghii (SORGHUM.ETHIOPIAN.2000)
PI456809	SRR7773889	Exotic	ETS 4344	Ethiopia	unknown	Kafir-durra (SORGHUM.ETHIOPIAN.2000)	Durra-kafir (SORGHUM.ETHIOPIAN.2000)
PI456811	SRR7773888	Exotic	ETS 4345	Ethiopia	unknown	Durra-bicolor (SORGHUM.ETHIOPIAN.2000)	Subglabrescens (SORGHUM.ETHIOPIAN.2000)
PI456819	SRR7773887	Exotic	ETS 4349	Ethiopia	unknown	Durra (SORGHUM.ETHIOPIAN.2000)	Durra-kafir (SORGHUM.ETHIOPIAN.2000)
PI456864	SRR7773692	Exotic	ETS 4370	Ethiopia	unknown	Kafir-durra (SORGHUM.ETHIOPIAN.2000)	Durra-kafir (SORGHUM.ETHIOPIAN.2000)
PI456865	SRR7773695	Exotic	ETS 4372	Ethiopia	unknown	Mixed (SORGHUM.ETHIOPIAN.2000)	Mixed (SORGHUM.ETHIOPIAN.2000)
PI456877	SRR7773605	Exotic	ETS 4377	Ethiopia	unknown	Caudatum (SORGHUM.ETHIOPIAN.2000)	Caudatum-kafir (SORGHUM.ETHIOPIAN.2000)
PI456899	SRR7773814	Exotic	ETS 4390	Ethiopia	unknown	Durra-bicolor (SORGHUM.ETHIOPIAN.2000)	Durra-bicolor (SORGHUM.ETHIOPIAN.2000)
PI456921	SRR7773688	Exotic	ETS 4404	Ethiopia	unknown	Durra-bicolor (SORGHUM.ETHIOPIAN.2000)	Durra-dochna (SORGHUM.ETHIOPIAN.2000)
PI456943	SRR7773709	Exotic	ETS 4415	Ethiopia	unknown	Kafir-durra (SORGHUM.ETHIOPIAN.2000)	Durra-kafir (SORGHUM.ETHIOPIAN.2000)
PI456979	SRR7773598	Exotic	ETS 4432	Ethiopia	unknown	Guinea-kafir (SORGHUM.ETHIOPIAN.2000)	Roxburghii-shallu (SORGHUM.ETHIOPIAN.2000)
PI456981	SRR7773597	Exotic	ETS 4436	Ethiopia	unknown	Durra-caudatum (SORGHUM.ETHIOPIAN.2000)	Durra-feterita/Kaura (SORGHUM.ETHIOPIAN.2000)
PI457006	SRR7773777	Exotic	ETS 4451	Ethiopia	unknown	Durra (SORGHUM.ETHIOPIAN.2000)	Subglabrescens-milo (SORGHUM.ETHIOPIAN.2000)
PI457014	SRR7773778	Exotic	ETS 4456	Ethiopia	unknown	Kafir-durra (SORGHUM.ETHIOPIAN.2000)	Durra-kafir (SORGHUM.ETHIOPIAN.2000)
PI457028	SRR7773779	Exotic	ETS 4463	Ethiopia	unknown	Guinea-kafir (SORGHUM.ETHIOPIAN.2000)	Roxburghii-shallu (SORGHUM.ETHIOPIAN.2000)
PI457056	SRR7773780	Exotic	ETS 4477	Ethiopia	unknown	Durra-bicolor (SORGHUM.ETHIOPIAN.2000)	Subglabrescens (SORGHUM.ETHIOPIAN.2000)
PI457068	SRR7773773	Exotic	ETS 4483	Ethiopia	unknown	Kafir-durra (SORGHUM.ETHIOPIAN.2000)	Durra-kafir (SORGHUM.ETHIOPIAN.2000)
PI457094	SRR7773774	Exotic	ETS 4499	Ethiopia	unknown	Durra (SORGHUM.ETHIOPIAN.2000)	Subglabrescens-milo (SORGHUM.ETHIOPIAN.2000)
PI457127	SRR7773689	Exotic	ETS 4519	Ethiopia	unknown	Durra-bicolor (SORGHUM.ETHIOPIAN.2000)	Subglabrescens (SORGHUM.ETHIOPIAN.2000)
PI457150	SRR7773606	Exotic	ETS 4531	Ethiopia	unknown	Caudatum (SORGHUM.ETHIOPIAN.2000)	Nigricans-feterita (SORGHUM.ETHIOPIAN.2000)
PI457194	SRR7773710	Exotic	ETS 4554	Ethiopia	unknown	Caudatum-bicolor (SORGHUM.ETHIOPIAN.2000)	Dochna-nigricans (SORGHUM.ETHIOPIAN.2000)
PI457234	SRR7773620	Exotic	ETS 4576	Ethiopia	unknown	Guinea-kafir (SORGHUM.ETHIOPIAN.2000)	Roxburghii-shallu (SORGHUM.ETHIOPIAN.2000)
PI457254	SRR7773944	Exotic	ETS 4587	Ethiopia	unknown	Guinea-kafir (SORGHUM.ETHIOPIAN.2000)	Roxburghii-shallu (SORGHUM.ETHIOPIAN.2000)
PI457263	SRR7773775	Exotic	ETS 4591	Ethiopia	unknown	Durra-bicolor (SORGHUM.ETHIOPIAN.2000)	Mixed (SORGHUM.ETHIOPIAN.2000)
PI457273	SRR7773776	Exotic	ETS 4595	Ethiopia	unknown	Durra (SORGHUM.ETHIOPIAN.2000)	Durra-kafir (SORGHUM.ETHIOPIAN.2000)
PI457276	SRR7773771	Exotic	ETS 4597	Ethiopia	unknown	Durra-bicolor (SORGHUM.ETHIOPIAN.2000)	Durra-bicolor (SORGHUM.ETHIOPIAN.2000)
PI457288	SRR7773772	Exotic	ETS 4602	Ethiopia	unknown	Kafir-durra (SORGHUM.ETHIOPIAN.2000)	Durra-kafir (SORGHUM.ETHIOPIAN.2000)
PI457298	SRR7773882	Exotic	ETS 4608	Ethiopia	unknown	Durra-bicolor (SORGHUM.ETHIOPIAN.2000)	Subglabrescens (SORGHUM.ETHIOPIAN.2000)
PI457303	SRR7773881	Exotic	ETS 4610	Ethiopia	unknown	Durra-bicolor (SORGHUM.ETHIOPIAN.2000)	Subglabrescens (SORGHUM.ETHIOPIAN.2000)
PI457348	SRR7773784	Exotic	ETS 4631	Ethiopia	unknown	Guinea-durra (SORGHUM.ETHIOPIAN.2000)	Durra-roxburghii (SORGHUM.ETHIOPIAN.2000)
PI457383	SRR7773783	Exotic	ETS 4647	Ethiopia	unknown	Durra-bicolor (SORGHUM.ETHIOPIAN.2000)	Durra-dochna (SORGHUM.ETHIOPIAN.2000)
PI457398	SRR7773786	Exotic	ETS 4654	Ethiopia	unknown	Durra-bicolor (SORGHUM.ETHIOPIAN.2000)	Durra-dochna (SORGHUM.ETHIOPIAN.2000)
PI457434	SRR7773825	Exotic	ETS 4670-B	Ethiopia	unknown	Durra-bicolor (SORGHUM.ETHIOPIAN.2000)	Durra-bicolor (SORGHUM.ETHIOPIAN.2000)
PI457473	SRR7773785	Exotic	ETS 4688	Ethiopia	unknown	Durra-caudatum (SORGHUM.ETHIOPIAN.2000)	Nigricans-durra (SORGHUM.ETHIOPIAN.2000)
PI457476	SRR7773788	Exotic	ETS 4690	Ethiopia	unknown	Durra-bicolor (SORGHUM.ETHIOPIAN.2000)	Durra-dochna (SORGHUM.ETHIOPIAN.2000)
PI457561	SRR7773787	Exotic	ETS 4736-A	Ethiopia	unknown	Durra (SORGHUM.ETHIOPIAN.2000)	Durra (SORGHUM.ETHIOPIAN.2000)
PI457563	SRR7773586	Exotic	ETS 4736-B	Ethiopia	unknown	Durra (SORGHUM.ETHIOPIAN.2000)	Durra (SORGHUM.ETHIOPIAN.2000)
PI457602	SRR7773858	Exotic	ETS 4755	Ethiopia	unknown	Kafir-durra (SORGHUM.ETHIOPIAN.2000)	Durra-kafir (SORGHUM.ETHIOPIAN.2000)
PI457638	SRR7773763	Exotic	ETS 4773	Ethiopia	unknown	Durra (SORGHUM.ETHIOPIAN.2000)	Durra (SORGHUM.ETHIOPIAN.2000)
PI457747	SRR7773879	Exotic	ETS 4841	Ethiopia	unknown	Durra (SORGHUM.ETHIOPIAN.2000)	Durra (SORGHUM.ETHIOPIAN.2000)
PI457799	SRR7773585	Exotic	ETS 4878	Ethiopia	unknown	Durra (SORGHUM.ETHIOPIAN.2000)	Mixed (SORGHUM.ETHIOPIAN.2000)
PI457859	SRR7773607	Exotic	ETS 4914	Ethiopia	unknown	Guinea-caudatum (SORGHUM.ETHIOPIAN.2000)	Nigricans-bicolor (SORGHUM.ETHIOPIAN.2000)
PI457862	SRR7773829	Exotic	ETS 4916	Ethiopia	unknown	Guinea-bicolor (SORGHUM.ETHIOPIAN.2000)	Dochna-roxburghii (SORGHUM.ETHIOPIAN.2000)
PI457867	SRR7773900	Exotic	ETS 4918	Ethiopia	unknown	Bicolor (SORGHUM.ETHIOPIAN.2000)	Dochna-leoti (SORGHUM.ETHIOPIAN.2000)
PI457897	SRR7773766	Exotic	ETS 4932	Ethiopia	unknown	Durra-caudatum (SORGHUM.ETHIOPIAN.2000)	Nigricans-durra (SORGHUM.ETHIOPIAN.2000)
PI533902	SRR7773823	Coverted	SC6	Ethiopia	unknown	unknown	Subglabrescens (SORGHUM.CONVERTED)
PI533903	SRR7773929	Coverted	SC17	Ethiopia	unknown	Bicolor (SORGHUM.CONVERTED)	Dochna (SORGHUM.CONVERTED)
PI533907	SRR7773830	Coverted	SC36	Ethiopia	unknown	unknown	Durra (SORGHUM.CONVERTED)
PI533918	SRR7773831	Coverted	SC112	Ethiopia	unknown	unknown	Zearazera
PI533923	SRR7773608	Coverted	SC165	Ethiopia	unknown	unknown	Caudatum-nigricans (SORGHUM.CONVERTED)
PI533939	SRR7773706	Coverted	SC557	Ethiopia	unknown	unknown	Nigricans (SORGHUM.CONVERTED)
PI534001	SRR7773609	Coverted	SC559	Ethiopia	unknown	unknown	Nigricans (SORGHUM.CONVERTED)
PI534118	SRR7773859	Coverted	SC2	Ethiopia	unknown	unknown	Durra (SORGHUM.CONVERTED)
PI534126	SRR7773832	Coverted	SC20	Ethiopia	unknown	Bicolor (SORGHUM.CONVERTED)	Dochna-honey (SORGHUM.CONVERTED)
PI534131	SRR7773833	Coverted	SC30	Ethiopia	unknown	unknown	Durra-bicolor (SORGHUM.CONVERTED)
PI534132	SRR7773755	Coverted	SC33	Ethiopia	unknown	Durra (SORGHUM.CONVERTED)	Durra (SORGHUM.CONVERTED)
PI534135	SRR7773760	Coverted	SC38	Ethiopia	unknown	unknown	Durra (SORGHUM.CONVERTED)
PI534136	SRR7773652	Coverted	SC43	Ethiopia	unknown	Durra-bicolor (SORGHUM.CONVERTED)	Subglabrescens (SORGHUM.CONVERTED)
PI534149	SRR7773653	Coverted	SC136	Ethiopia	unknown	unknown	Durra-dochna (SORGHUM.CONVERTED)
PI534150	SRR7773764	Coverted	SC137	Ethiopia	unknown	unknown	Durra-dochna (SORGHUM.CONVERTED)
PI534151	SRR7773834	Coverted	SC139	Ethiopia	unknown	Durra-bicolor (SORGHUM.CONVERTED)	Durra-dochna (SORGHUM.CONVERTED)
PI534155	SRR7773835	Coverted	SC155	Ethiopia	unknown	Durra-bicolor (SORGHUM.CONVERTED)	Durra-dochna (SORGHUM.CONVERTED)
PI534156	SRR7773836	Coverted	SC158	Ethiopia	unknown	unknown	Durra (SORGHUM.CONVERTED)
PI563092	SRR7773899	Exotic	BUTHA	Ethiopia	unknown	Caudatum (SORGHUM.STC1994)	unknown
PI576424	SRR7773647	Exotic	Boda	Ethiopia	unknown	unknown	unknown
PI576431	SRR7773827	Coverted	SC140	Ethiopia	unknown	unknown	unknown
PI585506	SRR7773822	Exotic	IS 25197	Ethiopia	unknown	Durra-bicolor (SORGHUM.STC1997)	Durra-dochna (SORGHUM.STC1997)

## Sheet: Table S2
Table S2 Anthracnose resistance response of 334 sorghum accession from NPGS Ethiopian germplasm collection
PI	Population	Isabela 2013	Mayaguez 2014	Isabela 2016	Isabela 2018		LS Means
PI329752	4	2	1	.	.		1.1821
PI329288	10	2	2	2	2		1.6416
PI329506	9	2	2	2	2		1.651
PI330124	9	2	2	2	.		1.6437
PI452728	Admixture	2	2	2	2		1.651
PI452969	Admixture	2	2	2	2		1.6417
PI453275	Admixture	2	2	2	2		1.6684
PI453300	9	2	2	2	2		1.651
PI453494	Admixture	2	2	2	2		1.6525
PI453604	Admixture	2	2	2	2		1.6654
PI453847	Admixture	2	2	2	2		1.6607
PI453890	Admixture	2	2	2	2		1.651
PI454148	Admixture	2	2	2	2		1.651
PI454443	Admixture	2	2	2	2		1.6417
PI454571	2	2	2	2	2		1.651
PI454584	10	2	2	2	2		1.6498
PI454998	Admixture	2	2	2	2		1.651
PI455213	Admixture	2	2	2	2		1.651
PI455248	9	2	2	2	2		1.6593
PI455384	7	2	2	2	2		1.6417
PI455606	Admixture	2	2	2	2		1.6307
PI455746	Admixture	2	2	2	2		1.6819
PI456056	Admixture	2	2	2	2		1.6417
PI456254	Admixture	2	2	2	2		1.6498
PI456300	6	2	2	2	2		1.6498
PI456398	3	2	2	2	.		1.628
PI456811	6	2	2	2	2		1.651
PI585506	9	2	2	2	2		1.6417
PI147932	5	2	2	.	2		1.6868
PI267595	Admixture	2	2	.	2		1.6756
PI267629	9	2	2	.	.		1.6821
PI267633	Admixture	2	2	.	2		1.7205
PI276813	10	2	2	.	2		1.6756
PI305055	10	2	2	.	2		1.6756
PI329272	7	2	2	.	.		1.6821
PI329479	Admixture	2	2	.	2		1.6756
PI329480	9	2	2	.	2		1.6756
PI329570	Admixture	2	2	.	2		1.6756
PI329658	9	2	2	.	2		1.6756
PI329863	9	2	2	.	2		1.6756
PI329881	9	2	2	.	2		1.6756
PI329903	9	2	2	.	2		1.6756
PI329960	7	2	2	.	2		1.6756
PI330007	10	2	2	.	2		1.6756
PI330077	Admixture	2	2	.	2		1.6756
PI330191	Admixture	2	2	.	2		1.6756
PI330295	Admixture	2	2	.	2		1.6868
PI330851	9	2	2	.	2		1.6756
PI452710	Admixture	2	2	.	2		1.6868
PI452719	8	2	2	.	2		1.6756
PI452724	7	2	2	.	2		1.6756
PI452727	Admixture	2	2	.	.		2.0202
PI452736	Admixture	2	2	.	2		1.6868
PI452903	Admixture	2	2	.	2		1.6756
PI452908	Admixture	2	2	.	2		1.6756
PI452967	9	2	2	.	2		1.6756
PI452987	7	2	2	.	2		1.6756
PI453065	7	2	2	.	.		1.6821
PI453073	7	2	2	.	2		1.6756
PI453074	11	2	2	.	2		1.6868
PI453144	11	2	2	.	2		1.6756
PI453186	Admixture	2	2	.	2		1.6756
PI453189	10	2	2	.	2		1.6756
PI453195	9	2	2	.	2		1.6756
PI453251	Admixture	2	2	.	2		1.6756
PI453309	Admixture	2	2	.	2		1.6756
PI453320	Admixture	2	2	.	2		1.6756
PI453478	3	2	2	.	2		1.6868
PI453587	Admixture	2	2	.	2		1.6756
PI453635	Admixture	2	2	.	2		1.6756
PI453648	Admixture	2	2	.	2		1.6756
PI453811	9	2	2	.	2		1.6756
PI453821	6	2	2	.	2		1.6756
PI453834	9	2	2	.	2		1.6756
PI453845	Admixture	2	2	.	2		1.6756
PI453882	5	2	2	.	2		1.6756
PI453919	Admixture	2	2	.	2		1.6756
PI453953	9	2	2	.	2		1.6756
PI454021	5	2	2	.	2		1.6756
PI454058	Admixture	2	2	.	2		1.6756
PI454293	3	2	2	.	2		1.6756
PI454556	9	2	2	.	2		1.6756
PI454572	Admixture	2	2	.	2		1.6756
PI454629	3	2	2	.	2		1.6756
PI454632	3	2	2	.	2		1.6756
PI454716	Admixture	2	2	.	2		1.6756
PI454791	10	2	2	.	.		1.6821
PI454873	Admixture	2	2	.	2		1.6756
PI454890	10	2	2	.	2		1.6756
PI455140	Admixture	2	2	.	2		1.6756
PI455144	2	2	2	.	2		1.6868
PI455182	Admixture	2	2	.	2		1.6868
PI455288	Admixture	2	2	.	2		1.6868
PI455295	Admixture	2	2	.	2		1.6756
PI455330	7	2	2	.	2		1.6687
PI455351	Admixture	2	2	.	2		1.6756
PI455365	Admixture	2	2	.	2		1.6756
PI455530	Admixture	2	2	.	2		1.6756
PI455616	6	2	2	.	2		1.6868
PI455674	3	2	2	.	2		1.6756
PI455787	Admixture	2	2	.	2		1.6756
PI455892	Admixture	2	2	.	2		1.6756
PI455901	Admixture	2	2	.	2		1.6756
PI455930	Admixture	2	2	.	2		1.6756
PI455976	Admixture	2	2	.	.		1.6821
PI455987	Admixture	2	2	.	2		1.6868
PI456103	4	2	2	.	2		1.6756
PI456128	6	2	2	.	2		1.6756
PI456157	Admixture	2	2	.	2		1.6756
PI456158	4	2	2	.	2		1.6868
PI456256	6	2	2	.	2		1.6756
PI456314	6	2	2	.	2		1.6868
PI456357	Admixture	2	2	.	2		1.6756
PI456499	3	2	2	.	2		1.6756
PI456538	3	2	2	.	2		1.6756
PI456581	Admixture	2	2	.	2		1.6756
PI456685	7	2	2	.	2		1.6756
PI456687	Admixture	2	2	.	2		1.6756
PI456795	6	2	2	.	2		1.6687
PI456809	6	2	2	.	2		1.6756
PI456819	6	2	2	.	2		1.6687
PI456899	6	2	2	.	2		1.6756
PI456981	6	2	2	.	2		1.6756
PI457028	6	2	2	.	2		1.6687
PI457273	6	2	2	.	2		1.6756
PI457398	Admixture	2	2	.	2		1.6756
PI457434	9	2	2	.	2		1.6868
PI457563	Admixture	2	2	.	2		1.6756
PI457602	10	2	2	.	2		1.6756
PI457638	10	2	2	.	2		1.6756
PI534126	Admixture	2	2	.	2		1.6756
PI534151	Admixture	2	2	.	2		1.6756
PI576424	3	2	2	.	2		1.6756
PI456490	3	.	2	.	2		1.5803
PI457348	Admixture	.	2	.	2		1.6008
PI534131	Admixture	.	2	.	2		1.6008
PI533918	Admixture	2	2	.	2		1.825
PI456110	6	2	2	.	.		1.6821
PI533902	9	2	2	.	.		2.0653
PI454484	2	2	2	.	.		1.6821
PI330271	Admixture	.	2	.	.		1.4643
PI329320	9	2	.	2	2		1.6983
PI453177	Admixture	2	.	2	2		1.7098
PI147933	5	2	.	.	2		1.746
PI197462	1	2	.	.	2		1.7981
PI273966	Admixture	2	.	.	2		1.746
PI305050	Admixture	2	.	.	2		1.746
PI329287	11	2	.	.	2		1.746
PI329294	7	2	.	.	2		1.7981
PI329374	9	2	.	.	2		1.746
PI329624	5	2	.	.	2		1.746
PI330858	5	2	.	.	2		1.7981
PI330871	2	2	.	.	2		1.746
PI452681	2	2	.	.	2		1.746
PI452988	7	2	.	.	2		1.746
PI453010	Admixture	2	.	.	2		1.746
PI453031	Admixture	2	.	.	2		1.746
PI453036	7	2	.	.	2		1.746
PI453070	11	2	.	.	2		1.746
PI454214	3	2	.	.	2		1.746
PI455070	6	2	.	.	2		1.746
PI455532	Admixture	2	.	.	2		1.7709
PI455558	Admixture	2	.	.	2		1.746
PI456359	Admixture	2	.	.	2		1.746
PI457068	6	2	.	.	2		1.746
PI305052	8	2	2	2	2.5		1.8498
PI330821	Admixture	2	2	2.5	.		2.0092
PI455036	Admixture	2	2	2.66667	.		2.0437
PI452944	11	2	2	3	.		2.168
PI453159	7	3	2	.	.		2.1821
PI455100	10	3	2	.	.		2.1821
PI456113	Admixture	3	2	.	.		2.1821
PI456478	Admixture	3	2	.	.		2.1821
PI329748	4	2	3	.	.		2.1821
PI330034	8	2	3	.	.		2.1821
PI453514	7	2	3	.	.		2.1821
PI453557	10	2	3	.	.		2.1821
PI453641	Admixture	2	3	.	.		2.1821
PI453701	7	2	3	.	.		2.1821
PI453936	11	2	3	.	.		2.1821
PI455017	Admixture	2	3	.	.		2.1821
PI455154	6	2	3	.	.		2.1821
PI455312	Admixture	2	3	.	.		2.1821
PI455451	3	2	3	.	.		2.1821
PI455806	Admixture	2	3	.	.		2.1821
PI456037	Admixture	2	3	.	.		2.1821
PI456304	Admixture	2	3	.	.		2.1821
PI456354	Admixture	2	3	.	.		2.1821
PI456415	3	2	3	.	.		2.1821
PI456877	2	2	3	.	.		2.1821
PI457094	6	2	3	.	.		2.1821
PI457303	6	2	3	.	.		2.1821
PI457747	7	2	3	.	.		2.1821
PI534136	9	2	.	.	3		2.4127
PI454221	Admixture	2	.	3.33333	.		2.6886
PI330275	Admixture	2	.	3.5	.		2.6825
PI456142	4	2	2	5	.		2.6551
PI533923	2	2	2	.	5		3.1756
PI453928	8	3	3	.	.		2.6821
PI456979	6	3	3	.	.		2.6821
PI453598	3	2	4	.	.		2.6821
PI454234	Admixture	2	4	.	.		2.6821
PI456711	6	2	4	.	.		2.6821
PI456739	6	2	4	.	.		2.6821
PI456921	6	2	4	.	.		2.6821
PI453680	Admixture	2	4	.	.		2.6821
PI453715	Admixture	2	4	.	.		2.6821
PI457254	Admixture	2	4	.	.		2.6821
PI267623	1	2	5	.	.		3.1821
PI329785	2	2	5	.	.		3.1821
PI330100	6	2	5	.	.		3.1821
PI330259	4	2	5	.	.		3.1821
PI452777	Admixture	2	5	.	.		3.1821
PI453075	11	2	5	.	.		3.1821
PI453884	Admixture	2	5	.	.		3.1821
PI454881	Admixture	2	5	.	.		3.1821
PI454991	6	2	5	.	.		3.1821
PI455038	Admixture	2	5	.	.		3.1821
PI455585	Admixture	2	5	.	.		3.1821
PI455830	Admixture	2	5	.	.		3.1821
PI455947	Admixture	2	5	.	.		3.1821
PI456293	Admixture	2	5	.	.		3.1821
PI456342	Admixture	2	5	.	.		3.1821
PI456632	Admixture	2	5	.	.		3.1821
PI457006	6	2	5	.	.		3.1821
PI457150	2	2	5	.	.		3.1821
PI457288	6	2	5	.	.		3.1821
PI457298	6	2	5	.	.		3.1821
PI534001	2	2	5	.	.		3.1821
PI453749	Admixture	2	5	.	.		3.1821
PI453831	6	2	5	.	.		3.1821
PI457897	10	2	5	.	.		3.1821
PI457234	Admixture	3	.	.	.		2.9
PI147935	7	3	.	.	.		2.9
PI195042	Admixture	3	.	.	.		2.9
PI330297	Admixture	3	.	.	.		2.9
PI453072	11	3	.	.	.		2.9
PI457862	Admixture	3	.	.	.		2.9
PI453035	7	3	.	.	.		2.9
PI456865	Admixture	3	.	.	.		2.9
PI457263	6	3	.	.	.		2.9
PI453196	Admixture	5	2	.	.		3.1821
PI453780	Admixture	5	2	.	.		3.1821
PI454609	Admixture	5	2	.	.		3.1821
PI453744	Admixture	4	3	.	.		3.1821
PI454296	Admixture	4	3	.	.		3.1821
PI453387	3	5	3	.	.		3.6821
PI454086	10	5	3	.	.		3.6821
PI455443	8	5	3	.	.		3.6821
PI455413	7	5	3	.	.		3.1821
PI453727	Admixture	3	4	.	.		3.1821
PI453781	Admixture	3	4	.	.		3.1821
PI454642	3	5	4	.	.		4.1821
PI457014	6	3	5	.	.		3.6821
PI457383	Admixture	3	5	.	.		3.6821
PI454083	8	3	5	.	.		3.6821
PI454153	Admixture	3	5	.	.		3.6821
PI456943	Admixture	3	5	.	.		3.6821
PI454323	Admixture	3	5	.	.		3.6821
PI454987	Admixture	3	5	.	.		3.6821
PI456605	3	3	5	.	.		3.6821
PI457476	Admixture	3	5	.	.		3.6821
PI453221	7	4	5	.	.		4.1821
PI453380	3	4	5	.	.		4.1821
PI453967	Admixture	4	5	.	.		4.1821
PI454981	Admixture	4	5	.	.		4.1821
PI455698	Admixture	4	5	.	.		4.1821
PI457056	6	4	5	.	.		4.1821
PI457127	6	4	5	.	.		4.1821
PI457473	Admixture	4	5	.	.		4.1821
PI457561	Admixture	4	5	.	.		4.1821
PI533907	Admixture	4	5	.	.		4.1821
PI455549	Admixture	5	5	5	.		4.6437
PI457867	1	5	5	5	.		4.628
PI452922	Admixture	5	5	.	.		4.6821
PI453576	3	5	5	.	.		4.6821
PI453670	Admixture	5	5	.	.		4.6821
PI257603	2	5	5	.	.		4.6821
PI267635	1	5	5	.	.		4.6821
PI273969	1	5	5	.	.		4.6821
PI318909	2	5	5	.	.		4.6821
PI329799	2	5	5	.	.		4.6821
PI452556	7	5	5	.	.		4.6821
PI452678	2	5	5	.	.		4.6821
PI454226	1	5	5	.	.		4.6821
PI454246	Admixture	5	5	.	.		4.6821
PI454382	3	5	5	.	.		4.6821
PI454483	10	5	5	.	.		4.6821
PI454519	Admixture	5	5	.	.		4.6821
PI454534	3	5	5	.	.		4.6821
PI454936	Admixture	5	5	.	.		4.6821
PI454941	Admixture	5	5	.	.		4.6821
PI455099	4	5	5	.	.		4.6821
PI455484	Admixture	5	5	.	.		4.6821
PI455693	3	5	5	.	.		4.6821
PI455811	Admixture	5	5	.	.		4.6821
PI455954	Admixture	5	5	.	.		4.6821
PI456024	Admixture	5	5	.	.		4.6821
PI456042	3	5	5	.	.		4.6821
PI456394	6	5	5	.	.		4.6821
PI456696	Admixture	5	5	.	.		4.6821
PI457799	Admixture	5	5	.	.		4.6821
PI534135	3	5	5	.	.		4.8012
PI563092	1	5	5	.	.		4.6821
PI305044	2	4	.	.	.		3.9
PI329733	3	4	.	.	.		3.9
PI453427	3	4	.	.	.		3.9
PI457194	Admixture	4	.	.	.		3.9
PI454516	Admixture	5	.	.	.		4.9
PI455391	Admixture	5	.	.	.		4.9
PI455545	Admixture	5	.	.	.		4.9
PI196054	1	5	.	.	.		4.9
PI276843	2	5	.	.	.		4.9
PI329386	Admixture	5	.	.	.		4.9
PI329434	2	5	.	.	.		4.9
PI452776	Admixture	5	.	.	.		4.9
PI452798	Admixture	5	.	.	.		4.9
PI452803	Admixture	5	.	.	.		4.9
PI454154	Admixture	5	.	.	.		4.9
PI452661	Admixture	.	4	.	.		3.4643
PI455791	Admixture	.	5	.	.		4.4643
PI534155	Admixture	.	5	.	.		2.4161
PI452847	Admixture	2	.	.	3		2.2981
PI534150	9	2	.	.	.		1.9
PI576431	Admixture	2	.	.	.		1.9
PI453046	Admixture	2	.	.	.		1.9
PI455538	Admixture	2	.	.	.		1.9
PI456623	Admixture	2	.	.	.		1.9
PI452680	Admixture	2	.	.	.		1.9
PI453938	Admixture	2	.	.	.		1.9
PI454594	3	2	.	.	.		1.9
PI455180	7	2	.	.	.		1.9
PI456660	9	2	.	.	.		1.9
PI457859	2	2	.	.	.		1.9
